# Supplementary material
Source: PubMed Central journal article supplement (PMC11005660)

## SUPPLEMENTAL MATERIAL

### **Pre-Stroke Physical Activity Matters for Functional Limitations: A Longitudinal Case-Control Study of 12,860 Participants**

Zack van Allen, Dan Orsholits, Matthieu P. Boisgontier

**Table S1.** Stroke survivors with at least slight dependency in activities of daily living (ADLs) at 1-year follow-up.

**Table S2.** Stroke survivors with at least moderate dependency in activities of daily living (ADLs) at 1-year follow-up.

**Table S3.** Stroke survivors with severe or total dependency in activities of daily living (ADLs) at 1-year follow-up.

**Table S4.** Stroke survivors who are moderately active in instrumental activities of daily living (IADLs) at 1-year follow-up.

**Table S5.** Stroke survivors who are inactive in instrumental activities of daily living (IADLs) at 1-year follow-up.

**Table S6.** Activities of daily living (ADLs) and instrumental activities of daily living (IADLs) counts for stroke survivors and stroke-free adults. Counts reflect the number of I/ADL limitations reported.

**Table S7.** Frequency of moderate and vigorous physical activity in stroke survivors and stroke-free adults at baseline.

**Table S8.** Counts of physically active and inactive participants in stroke survivors and stroke-free adults.

**Table S9.** Results of the sensitivity analyses testing the interaction between stroke-related status and physical activity (“hardly ever or never” vs. “at least once a month”) on limitations in activities of daily living (ADLs) and instrumental activities of daily living (IADLs).

**Figure S1.** Result of the sensitivity analysis showing the effect of physical activity (“Hardly ever or never” vs. “At least once a month”) on limitations in activities of daily living (ADLs) and instrumental activities of daily living (IADLs) in stroke survivors and matched stroke-free adults over time.

**Table S1.** Stroke survivors with at least slight dependency in activities of daily living (ADLs) at 1-year follow-up

| Study                    | Outcome Measure        | Threshold | Sample Size (n) | Dependent Survivors (%) |
|--------------------------|------------------------|-----------|-----------------|-------------------------|
| Appelros (2007)          | Barthel Index          | <20/20    | 246             | 39.0                    |
| Ayerbe (2011)            | Barthel Index          | <20/20    | 1732            | 67.0                    |
| Carolei (1997)           | Barthel Index          | <20/20    | 517             | 61.7                    |
| Dhamoon (2009)           | Barthel Index          | <95/100   | 525             | 48.1                    |
| Gil-Salcedo (2022)       | Modified Ranking Scale | >1/6      | 3718            | 63.8                    |
| Hartman-Macir (2007)     | FIM motor scale        | <91/91    | 56              | 68.0                    |
| Leśniak (2008)           | Barthel Index          | <20/20    | 80              | 43.7                    |
| Mar (2015)               | Barthel Index          | <100/100  | 250             | 47.2                    |
| Minelli (2007)           | Barthel Index          | <100/100  | 79              | 57.0                    |
| Skánér (2007)            | Katz ADL               | <6/6      | 135             | 31.9                    |
| Sveen (1996)             | Barthel Index          | <20/20    | 74              | 58.1                    |
| Taub (1994)              | Barthel Index          | <20/20    | 225             | 34.0                    |
| van de Port (2006)       | Barthel Index          | <19/20    | 264             | 40.1                    |
| Willey (2010)            | Barthel Index          | <95/100   | 246             | 44.7                    |
| Wong (2014)              | Modified Ranking Scale | >1/6      | 194             | 64.4                    |
| <b>Total n</b>           |                        |           | <b>8341</b>     |                         |
| <b>Weighted mean (%)</b> |                        |           |                 | <b>59.2</b>             |

Note. FIM = Functional Independent Measure.

**Table S2.** Stroke survivors with at least moderate dependency in activities of daily living (ADLs) at 1-year follow-up

| Study                    | Outcome Measure        | Threshold | Sample Size (n) | Dependent Survivors (%) |
|--------------------------|------------------------|-----------|-----------------|-------------------------|
| Appelros (2007)          | Barthel Index          | <15/20    | 246             | 31.2                    |
| Broussy (2019)           | Modified Ranking Scale | >2/6      | 161             | 29.6                    |
| De Campos (2017)         | Modified Ranking Scale | >2/6      | 287             | 16.4                    |
| Jokinen (2015)           | Modified Ranking Scale | >2/6      | 364             | 44.0                    |
| López-Cancio (2017)      | Modified Ranking Scale | >2/6      | 143             | 53.8                    |
| Mar (2015)               | Barthel Index          | <90/100   | 250             | 40.4                    |
| Patel (2002)             | Barthel Index          | <15/20    | 619             | 36.2                    |
| Patel (2003)             | Barthel Index          | <15/20    | 136             | 36.0                    |
| Santus (1990)            | Barthel Index          | <75/100   | 76              | 46.1                    |
| Taub (1994)              | Barthel Index          | <15/20    | 225             | 11.0                    |
| Urbanek (2018)           | Modified Ranking Scale | >2/6      | 1119            | 41.6                    |
| Verhoeven (2011)         | Barthel Index          | <18/20    | 92              | 38.0                    |
| Wafa (2020)              | Barthel Index          | <15/20    | 1961            | 24.1                    |
| Wolfe (2011)             | Barthel Index          | <15/20    | 1578            | 13.1                    |
| Wong (2014)              | Modified Ranking Scale | >2/6      | 194             | 33.0                    |
| <b>Total (n)</b>         |                        |           | <b>7451</b>     |                         |
| <b>Weighted mean (%)</b> |                        |           |                 | <b>32.9</b>             |

**Table S3.** Stroke survivors with severe or total dependency in activities of daily living (ADLs) at 1-year follow-up

| Study                    | Outcome Measure        | Threshold | Sample Size (n) | Dependent Survivors (%) |
|--------------------------|------------------------|-----------|-----------------|-------------------------|
| Appelros (2007)          | Barthel Index          | <12/20    | 246             | 16.0                    |
| Broussy (2019)           | Barthel Index          | <12/20    | 161             | 12.7                    |
| Dhamoon (2009)           | Barthel Index          | <60/100   | 525             | 18.0                    |
| Gil-Salcedo (2022)       | Modified Ranking Scale | >3/6      | 3718            | 27.3                    |
| Mar (2015)               | Barthel Index          | <60/100   | 250             | 20.4                    |
| Patel (2002)             | Barthel Index          | <10/20    | 619             | 9.4                     |
| Patel (2003)             | Barthel Index          | <10/20    | 136             | 15.4                    |
| Willey (2010)            | Barthel Index          | <60/100   | 246             | 15.9                    |
| Wong (2014)              | Modified Ranking Scale | >3/6      | 194             | 19.6                    |
| <b>Total n</b>           |                        |           | <b>6095</b>     |                         |
| <b>Weighted mean (%)</b> |                        |           |                 | <b>22.6</b>             |

**Table S4.** Stroke survivors who are moderately active in instrumental activities of daily living (IADLs) at 1-year follow-up.

| Study                    | Outcome Measure           | Threshold | Sample Size (n) | Dependent Survivors (%) |
|--------------------------|---------------------------|-----------|-----------------|-------------------------|
| Appelros (2007)          | Frenchay Activities Index | <30/45    | 246             | 78.8                    |
| Ayerbe (2011)            | Frenchay Activities Index | <30/45    | 1403            | 79.7                    |
| Patel (2002)             | Frenchay Activities Index | <30/45    | 619             | 85.7                    |
| Patel (2003)             | Frenchay Activities Index | <30/45    | 136             | 88.2                    |
| Sveen (1996)             | Frenchay Activities Index | <29/45    | 74              | 75.6                    |
| <b>Total n</b>           |                           |           | <b>2478</b>     |                         |
| <b>Weighted mean (%)</b> |                           |           |                 | <b>81.5</b>             |

**Table S5.** Stroke survivors who are inactive in instrumental activities of daily living (IADLs) at 1-year follow-up.

| Study                    | Outcome Measure           | Threshold | Sample Size (n) | Dependent Survivors (%) |
|--------------------------|---------------------------|-----------|-----------------|-------------------------|
| Appelros (2007)          | Frenchay Activities Index | <15/45    | 246             | 46.3                    |
| Patel (2002)             | Frenchay Activities Index | <15/45    | 619             | 40.4                    |
| Patel (2003)             | Frenchay Activities Index | <15/45    | 136             | 72.7                    |
| van de Port (2006)       | Frenchay Activities Index | <15/45    | 264             | 35.2                    |
| Wolfe (2011)             | Frenchay Activities Index | <15/45    | 1578            | 38.8                    |
| <b>Total n</b>           |                           |           | <b>2843</b>     |                         |
| <b>Weighted mean (%)</b> |                           |           |                 | <b>41.1</b>             |

**Table S6.** Activities of daily living (ADLs) and instrumental activities of daily living (IADLs) counts for stroke survivors and stroke-free adults. Counts reflect the number of I/ADL limitations reported.

| Activities of Daily Living (ADLs) |        |        |        |        |        |        |        |        |
|-----------------------------------|--------|--------|--------|--------|--------|--------|--------|--------|
| Stroke Survivors                  |        |        |        |        |        |        |        |        |
| ADL                               | Wave 1 | Wave 2 | Wave 3 | Wave 4 | Wave 5 | Wave 6 | Wave 7 | Wave 8 |
| 0                                 | 929    | 1162   | NA     | 1287   | 1389   | 1307   | 1115   | 795    |
| 1                                 | 68     | 92     | NA     | 151    | 166    | 187    | 188    | 139    |
| 2                                 | 20     | 36     | NA     | 62     | 89     | 125    | 126    | 70     |
| 3                                 | 11     | 23     | NA     | 48     | 45     | 58     | 59     | 57     |
| 4                                 | 4      | 10     | NA     | 22     | 33     | 40     | 53     | 36     |
| 5                                 | 2      | 7      | NA     | 31     | 29     | 50     | 51     | 45     |
| 6                                 | 2      | 11     | NA     | 34     | 57     | 72     | 86     | 79     |
| NA                                | 1125   | 820    | 2161   | 526    | 353    | 322    | 483    | 940    |
| Stroke-Free Adults                |        |        |        |        |        |        |        |        |
| IADL                              | Wave 1 | Wave 2 | Wave 3 | Wave 4 | Wave 5 | Wave 6 | Wave 7 | Wave 8 |
| 0                                 | 4627   | 5964   | NA     | 7258   | 7770   | 7685   | 7077   | 4974   |
| 1                                 | 259    | 391    | NA     | 624    | 636    | 734    | 694    | 491    |
| 2                                 | 91     | 130    | NA     | 210    | 257    | 316    | 289    | 207    |
| 3                                 | 36     | 59     | NA     | 117    | 141    | 130    | 150    | 125    |
| 4                                 | 29     | 40     | NA     | 70     | 94     | 111    | 81     | 82     |
| 5                                 | 3      | 29     | NA     | 53     | 79     | 84     | 102    | 55     |
| 6                                 | 16     | 21     | NA     | 71     | 78     | 95     | 130    | 105    |
| NA                                | 5744   | 4171   | 10805  | 2402   | 1750   | 1650   | 2282   | 4766   |

  

| Instrumental Activities of Daily Living (ADLs) |        |        |        |        |        |        |        |        |
|------------------------------------------------|--------|--------|--------|--------|--------|--------|--------|--------|
| Stroke Survivors                               |        |        |        |        |        |        |        |        |
| IADL                                           | Wave 1 | Wave 2 | Wave 3 | Wave 4 | Wave 4 | Wave 6 | Wave 7 | Wave 8 |
| 0                                              | 869    | 1050   | NA     | 1158   | 1201   | 1091   | 931    | 625    |
| 1                                              | 104    | 154    | NA     | 203    | 233    | 272    | 216    | 154    |
| 2                                              | 31     | 63     | NA     | 103    | 113    | 130    | 140    | 105    |
| 3                                              | 14     | 23     | NA     | 48     | 66     | 93     | 100    | 67     |
| 4                                              | 9      | 13     | NA     | 26     | 58     | 67     | 73     | 68     |
| 5                                              | 6      | 10     | NA     | 29     | 39     | 57     | 60     | 52     |
| 6                                              | 1      | 15     | NA     | 23     | 31     | 49     | 57     | 41     |
| 7                                              | 2      | 13     | NA     | 45     | 67     | 80     | 101    | 109    |
| NA                                             | 1125   | 820    | 2161   | 526    | 353    | 322    | 483    | 940    |
| Stroke-Free Adults                             |        |        |        |        |        |        |        |        |
| IADL                                           | Wave 1 | Wave 2 | Wave 3 | Wave 4 | Wave 5 | Wave 6 | Wave 7 | Wave 8 |
| 0                                              | 4315   | 5490   | NA     | 6726   | 7109   | 6968   | 6291   | 4371   |
| 1                                              | 458    | 648    | NA     | 857    | 912    | 1016   | 945    | 720    |
| 2                                              | 157    | 239    | NA     | 351    | 387    | 444    | 437    | 289    |
| 3                                              | 63     | 108    | NA     | 153    | 205    | 248    | 247    | 193    |
| 4                                              | 30     | 64     | NA     | 104    | 150    | 180    | 190    | 139    |
| 5                                              | 14     | 38     | NA     | 71     | 95     | 97     | 160    | 104    |
| 6                                              | 10     | 23     | NA     | 48     | 73     | 74     | 97     | 77     |
| 7                                              | 14     | 24     | NA     | 93     | 124    | 128    | 156    | 146    |
| NA                                             | 5744   | 4171   | 10805  | 2402   | 1750   | 1650   | 2282   | 4766   |

**Table S7.** Frequency of moderate and vigorous physical activity in stroke survivors and stroke-free adults at baseline.

| Physical Activity Frequency | Stroke Survivors           |                            | Stroke-Free Adults         |                            |
|-----------------------------|----------------------------|----------------------------|----------------------------|----------------------------|
|                             | Moderate Physical Activity | Vigorous Physical Activity | Moderate Physical Activity | Vigorous Physical Activity |
| Hardly ever or never        | 258                        | 931                        | 1086                       | 4291                       |
| One to three times a month  | 127                        | 216                        | 575                        | 1050                       |
| Once a week                 | 274                        | 306                        | 1415                       | 1501                       |
| More than once a week       | 1500                       | 706                        | 7702                       | 3937                       |
| NA                          | 2                          | 2                          | 27                         | 26                         |

Notes. The question for assessing moderate physical activity was “How often do you engage in activities that require a low or moderate level of energy such as gardening, cleaning the car, or doing a walk?”. The question for assessing vigorous physical activity was “How often do you engage in vigorous physical activity, such as sports, heavy housework, or a job that involves physical labor?”

**Table S8.** Counts of physically active and inactive participants in stroke survivors and stroke-free adults.

| Type of Analysis     | Stroke Survivors    |                   | Stroke-Free Adults  |                   |
|----------------------|---------------------|-------------------|---------------------|-------------------|
|                      | Physically Inactive | Physically Active | Physically Inactive | Physically Active |
| Main Analyses        | 595                 | 1564              | 2720                | 8060              |
| Sensitivity Analyses | 1202                | 957               | 6343                | 4434              |

Notes. In the main analyses, participants who answered “more than once a week” to at least one of the questions were classified as physically active, whereas the other participants were classified as physically inactive. In the sensitivity analyses, participants who answered “hardly ever or never” to one of the two questions related to the level of physical activity were classified as physically inactive, whereas the other participants were classified as physically active.

**Table S9.** Results of the sensitivity analyses testing the interaction between stroke-related status and physical activity (hardly ever or never vs. at least once a month) on limitations in activities of daily living (ADLs) and instrumental activities of daily living (IADLs).

| Exposures                  | ADL                       |                         | IADL                      |                         |
|----------------------------|---------------------------|-------------------------|---------------------------|-------------------------|
|                            | b (95 CI)                 | p                       | b (95 CI)                 | p                       |
| Intercept                  | -0.563 (-0.653 to -0.474) | $< 2.0 \times 10^{-16}$ | -1.137 (-1.255 to -1.019) | $< 2.0 \times 10^{-16}$ |
| Stroke                     | -0.044 (-0.089 to 0.001)  | 0.056                   | -0.045 (-0.100 to 0.010)  | 0.107                   |
| Physical Activity          | 0.223 (0.198 to 0.247)    | $< 2.0 \times 10^{-16}$ | 0.317 (0.285 to 0.348)    | $< 2.0 \times 10^{-16}$ |
| Wave                       | 0.016 (0.005 to 0.027)    | 0.003                   | 0.017 (0.003 to 0.030)    | 0.015                   |
| Wave <sup>2</sup>          | 0.006 (0.005 to 0.008)    | $1.1 \times 10^{-14}$   | 0.013 (0.011 to 0.015)    | $< 2.0 \times 10^{-16}$ |
| Age                        | 0.007 (0.005 to 0.008)    | $< 2.0 \times 10^{-16}$ | 0.012 (0.011 to 0.014)    | $< 2.0 \times 10^{-16}$ |
| Sex                        | 0.063 (0.041 to 0.085)    | $3.0 \times 10^{-8}$    | 0.192 (0.164 to 0.221)    | $< 2.0 \times 10^{-16}$ |
| Education                  |                           |                         |                           |                         |
| Primary (vs. Secondary)    | 0.117 (0.091 to 0.142)    | $< 2.0 \times 10^{-16}$ | 0.224 (0.191 to 0.256)    | $< 2.0 \times 10^{-16}$ |
| Tertiary (vs. Secondary)   | -0.026 (-0.055 to 0.003)  | 0.074                   | -0.047 (-0.083 to -0.011) | 0.011                   |
| Chronic Conditions         | 0.113 (0.099 to 0.128)    | $< 2.0 \times 10^{-16}$ | 0.178 (0.160 to 0.196)    | $< 2.0 \times 10^{-16}$ |
| Stroke × Physical Activity | 0.084 (0.026 to 0.142)    | 0.004                   | 0.062 (-0.012 to 0.136)   | 0.098                   |
| Stroke × Wave              | 0.022 (-0.005 to 0.048)   | 0.109                   | 0.032 (0.000 to 0.065)    | 0.052                   |
| Stroke × Wave <sup>2</sup> | 0.014 (0.010 to 0.018)    | $7.9 \times 10^{-13}$   | 0.020 (0.015 to 0.025)    | $6.7 \times 10^{-15}$   |

Notes. 95 CI = 95% confidence interval, ADL = activities of daily living, IADL = instrumental activities of daily living

**Figure S1.** Result of the sensitivity analysis showing the effect of physical activity (PA; “Hardly ever or never” vs. “At least once a month”) on limitations in activities of daily living (ADLs) and instrumental activities of daily living (IADLs) in stroke survivors and matched stroke-free adults over time.

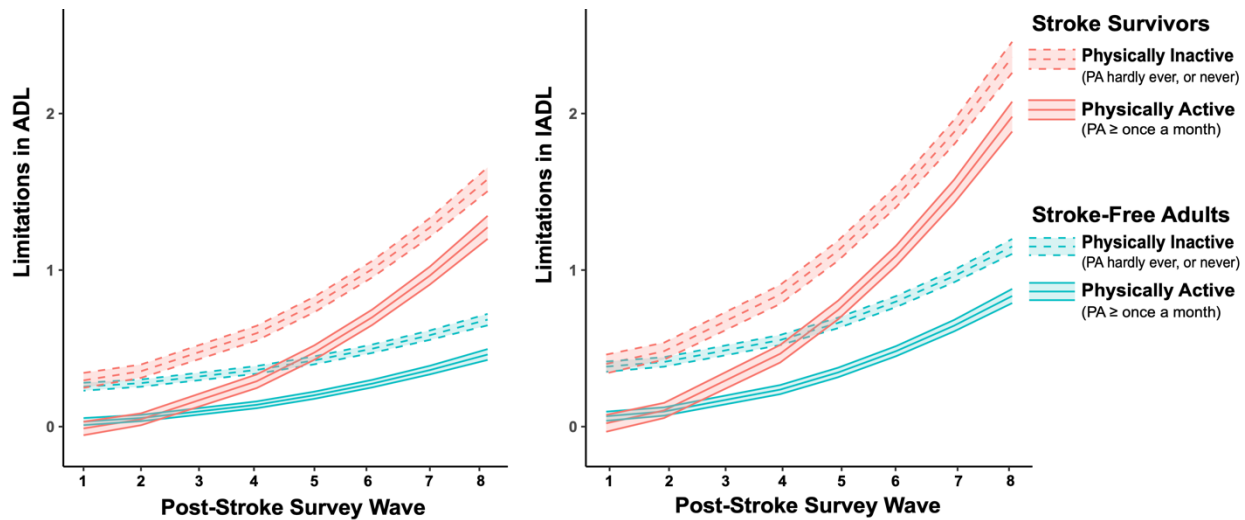

Supplement: NIHPP2023.09.14.23295576v3-supplement-1.pdf [file NIHPP2023.09.14.23295576v3-supplement-1.pdf]
